# Supplementary material for: Forward molecular design for highly efficient OLED emitters: A theoretical analysis of photophysical properties of platinum(ii) complexes with N-heterocyclic carbene ligands
Source: Royal Society of Chemistry journal article supplement (doi:10.1039/c0dt01299h), 2011-01-01
Supplement: c0dt01299h.pdf [file c0dt01299h.pdf]

## Electronic Supplementary Information

# Forward Molecular Design for Highly Efficient OLED Emitters: A Theoretical Analysis of Photophysical Properties of Platinum(II) Complexes with *N*-Heterocyclic Carbene Ligands

Yong Wu, Shui-Xing Wu, Hai-Bin Li, Yun Geng, Zhong-Min Su\*

*Institute of Functional Material Chemistry, Faculty of Chemistry, Northeast Normal University, Changchun 130024, China*

**Author for correspondence: Prof. Zhong-Min Su.** E-mail: [zmsu@nenu.edu.cn](mailto:zmsu@nenu.edu.cn)

**Table S1.** The optimized  $S_0$  geometric parameters of **5** obtained by different functionals.

|            | GGA   |       |       |       | meta-GGA | Expt. |
|------------|-------|-------|-------|-------|----------|-------|
|            | BP86  | PBE   | mPBE  | PW91  | TPSS     |       |
| Pt-C:1     | 2.052 | 2.049 | 2.052 | 2.048 | 2.055    | 2.024 |
| Pt-C:2     | 2.052 | 2.049 | 2.052 | 2.048 | 2.055    | 2.028 |
| Pt-C:3     | 2.052 | 2.049 | 2.052 | 2.048 | 2.055    | 2.028 |
| Pt-C:4     | 2.052 | 2.049 | 2.052 | 2.048 | 2.055    | 2.025 |
| C:1-Pt-C:4 | 180.0 | 180.0 | 180.0 | 180.0 | 180.0    | 180.0 |
| C:2-Pt-C:3 | 180.0 | 180.0 | 180.0 | 180.0 | 180.0    | 180.0 |
| C:1-Pt-C:3 | 95.6  | 96.5  | 96.6  | 96.5  | 96.7     | 95.8  |
| C:2-Pt-C:4 | 96.6  | 96.5  | 96.6  | 96.5  | 96.7     | 95.8  |
| N1-C5-N2   | 109.5 | 109.6 | 109.6 | 109.6 | 109.3    | 108.7 |
| N3-C6-N4   | 109.5 | 109.6 | 109.6 | 109.6 | 109.3    | 108.7 |

\* Email Address: [zmsu@nenu.edu.cn](mailto:zmsu@nenu.edu.cn)

**Figure S1.** The truncated models, and the frontier molecular orbitals of non-truncated model 7.

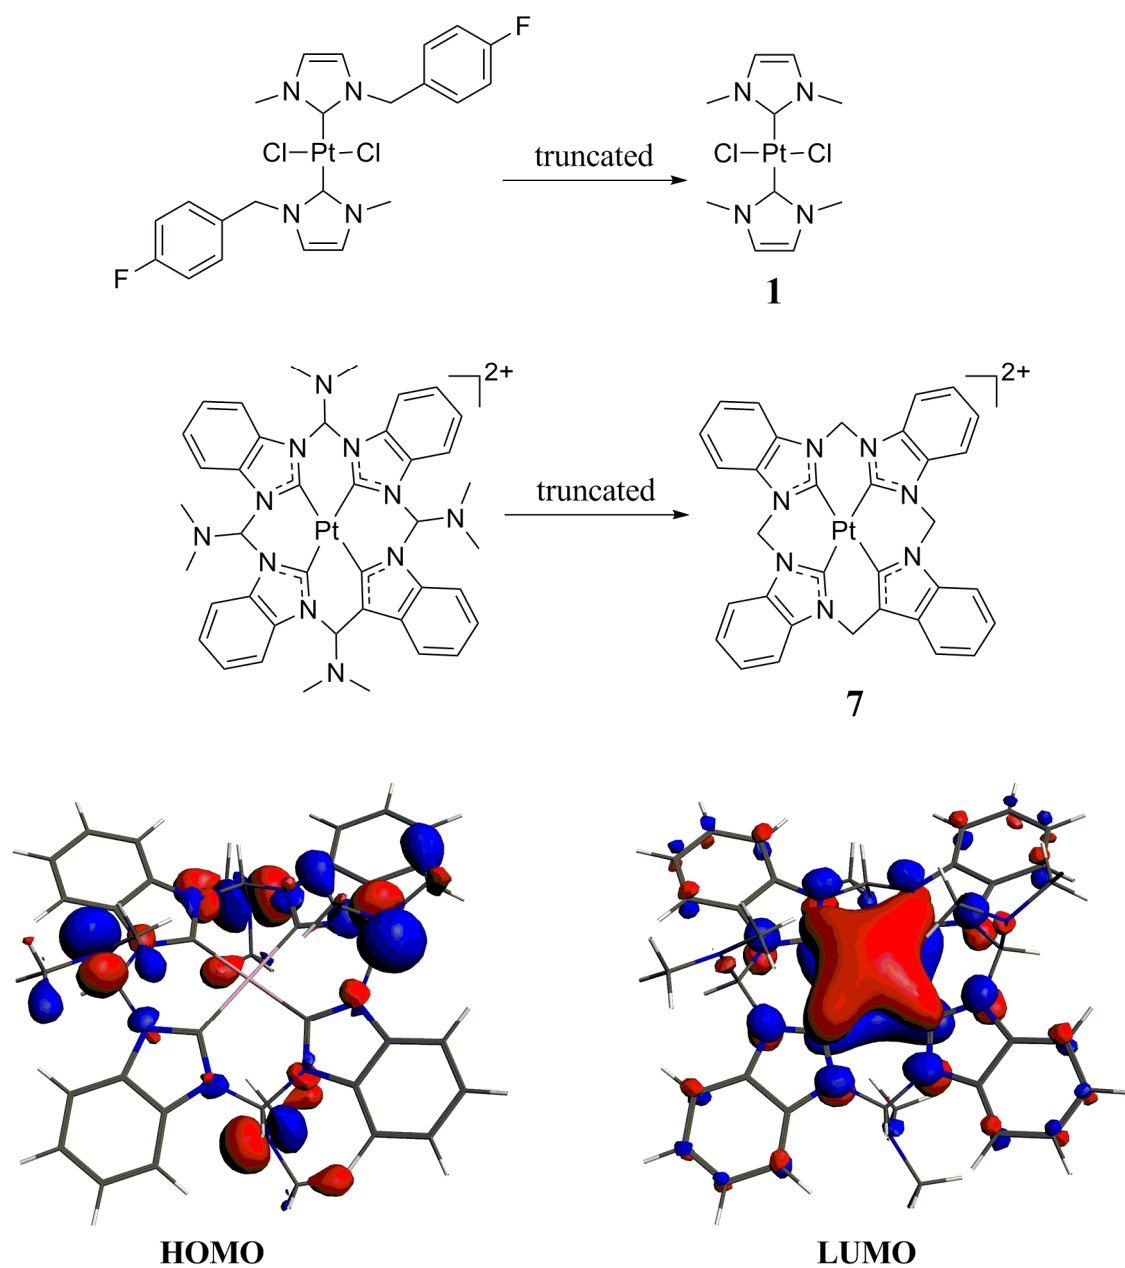

**Figure S2.** The optimized geometry of 1-8.

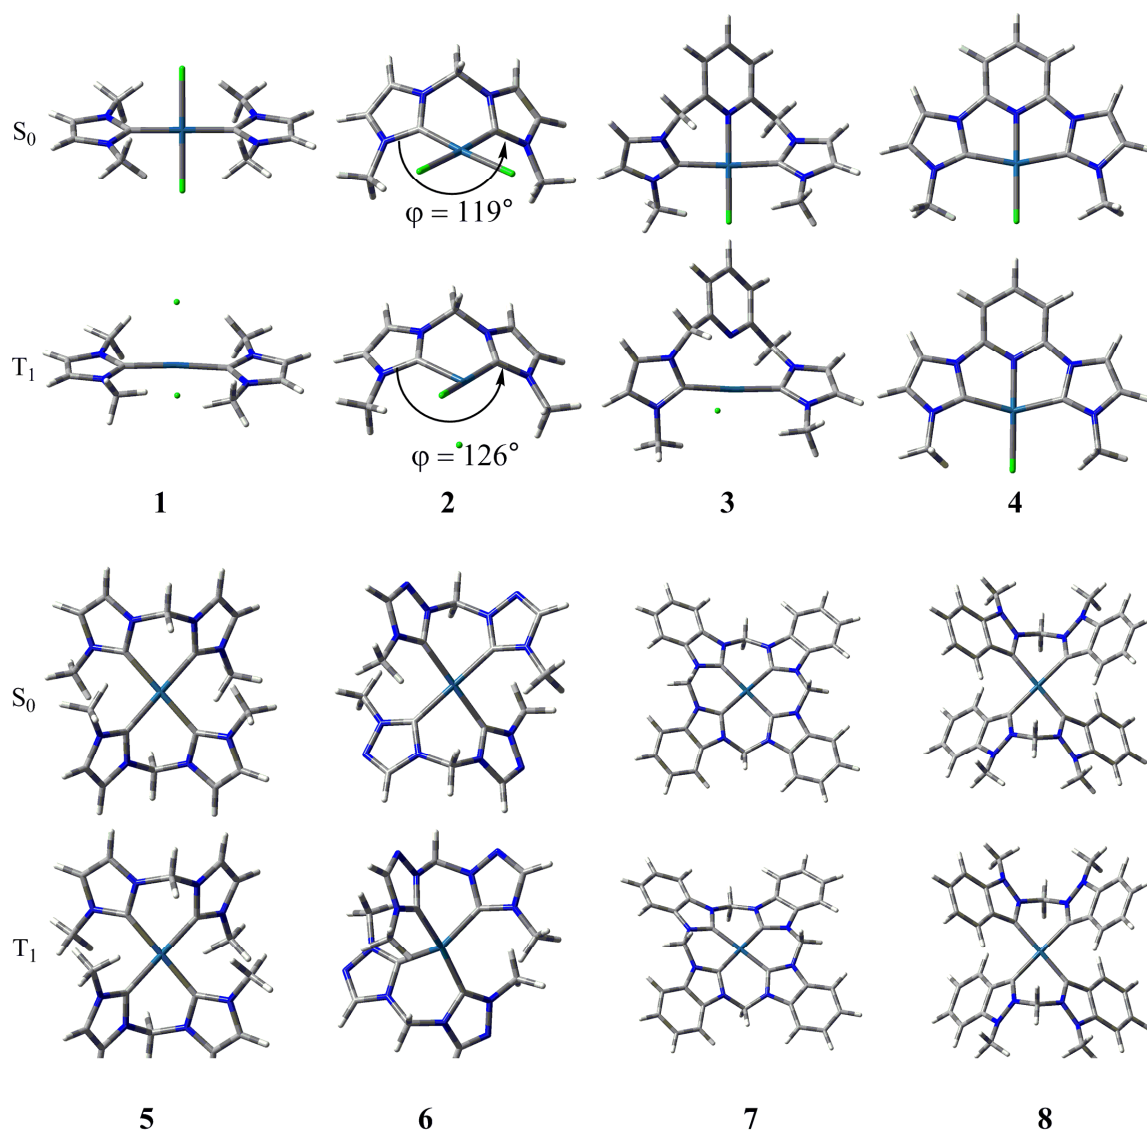

**Table S2.** The optimized  $S_0$  geometrical parameters of **7** and the non-truncated model, together with the experimental values.

|                                                | <b>7</b> | non-truncated | Expt. |
|------------------------------------------------|----------|---------------|-------|
| Pt-C:1                                         | 1.996    | 2.000         | 1.980 |
| Pt-C:2                                         | 1.996    | 2.000         | 1.969 |
| Pt-C:3                                         | 1.996    | 2.000         | 1.978 |
| Pt-C:4                                         | 1.996    | 2.000         | 1.973 |
| C:1-Pt-C:4                                     | 180.0    | 179.5         | 179.0 |
| C:2-Pt-C:3                                     | 180.0    | 179.5         | 178.8 |
| C:1-Pt-C:3                                     | 90.0     | 90.0          | 90.2  |
| C:2-Pt-C:4                                     | 90.0     | 90.0          | 90.6  |
| N <sub>1</sub> -C <sub>5</sub> -N <sub>2</sub> | 114.6    | 110.7         | 110.9 |
| N <sub>3</sub> -C <sub>6</sub> -N <sub>4</sub> | 114.6    | 110.7         | 110.3 |
| N <sub>5</sub> -C <sub>7</sub> -N <sub>6</sub> | 114.6    | 110.7         | 110.7 |
| N <sub>7</sub> -C <sub>8</sub> -N <sub>8</sub> | 114.6    | 110.7         | 110.9 |
| D <sub>NHC1</sub> -NHC2                        | 180.0    | 175.5         | 178.1 |
| D <sub>NHC2</sub> -NHC3                        | 180.0    | 175.4         | 175.8 |
| D <sub>NHC3</sub> -NHC4                        | 180.0    | 175.4         | 176.0 |
| D <sub>NHC4</sub> -NHC1                        | 180.0    | 175.5         | 178.0 |

**Table S3.** The lowest unoccupied molecular orbital (LUMO) compositions (%) in the ground state for tetracarbene complexes **5-8**.

|                      | <b>5</b> | <b>6</b> | <b>7</b> | <b>8</b> |
|----------------------|----------|----------|----------|----------|
| 6p <sub>z</sub> (Pt) | 12.63    | 10.51    | 12.72    | 6.13     |
| p(C:NHC)             | 25.16    | 31.40    | 32.67    | 16.29    |



**Figure S3.** The localization and delocalization of sigma Pt-C: in occupied orbitals of  $S_0$  state for tetracarbene complexes 5-8.

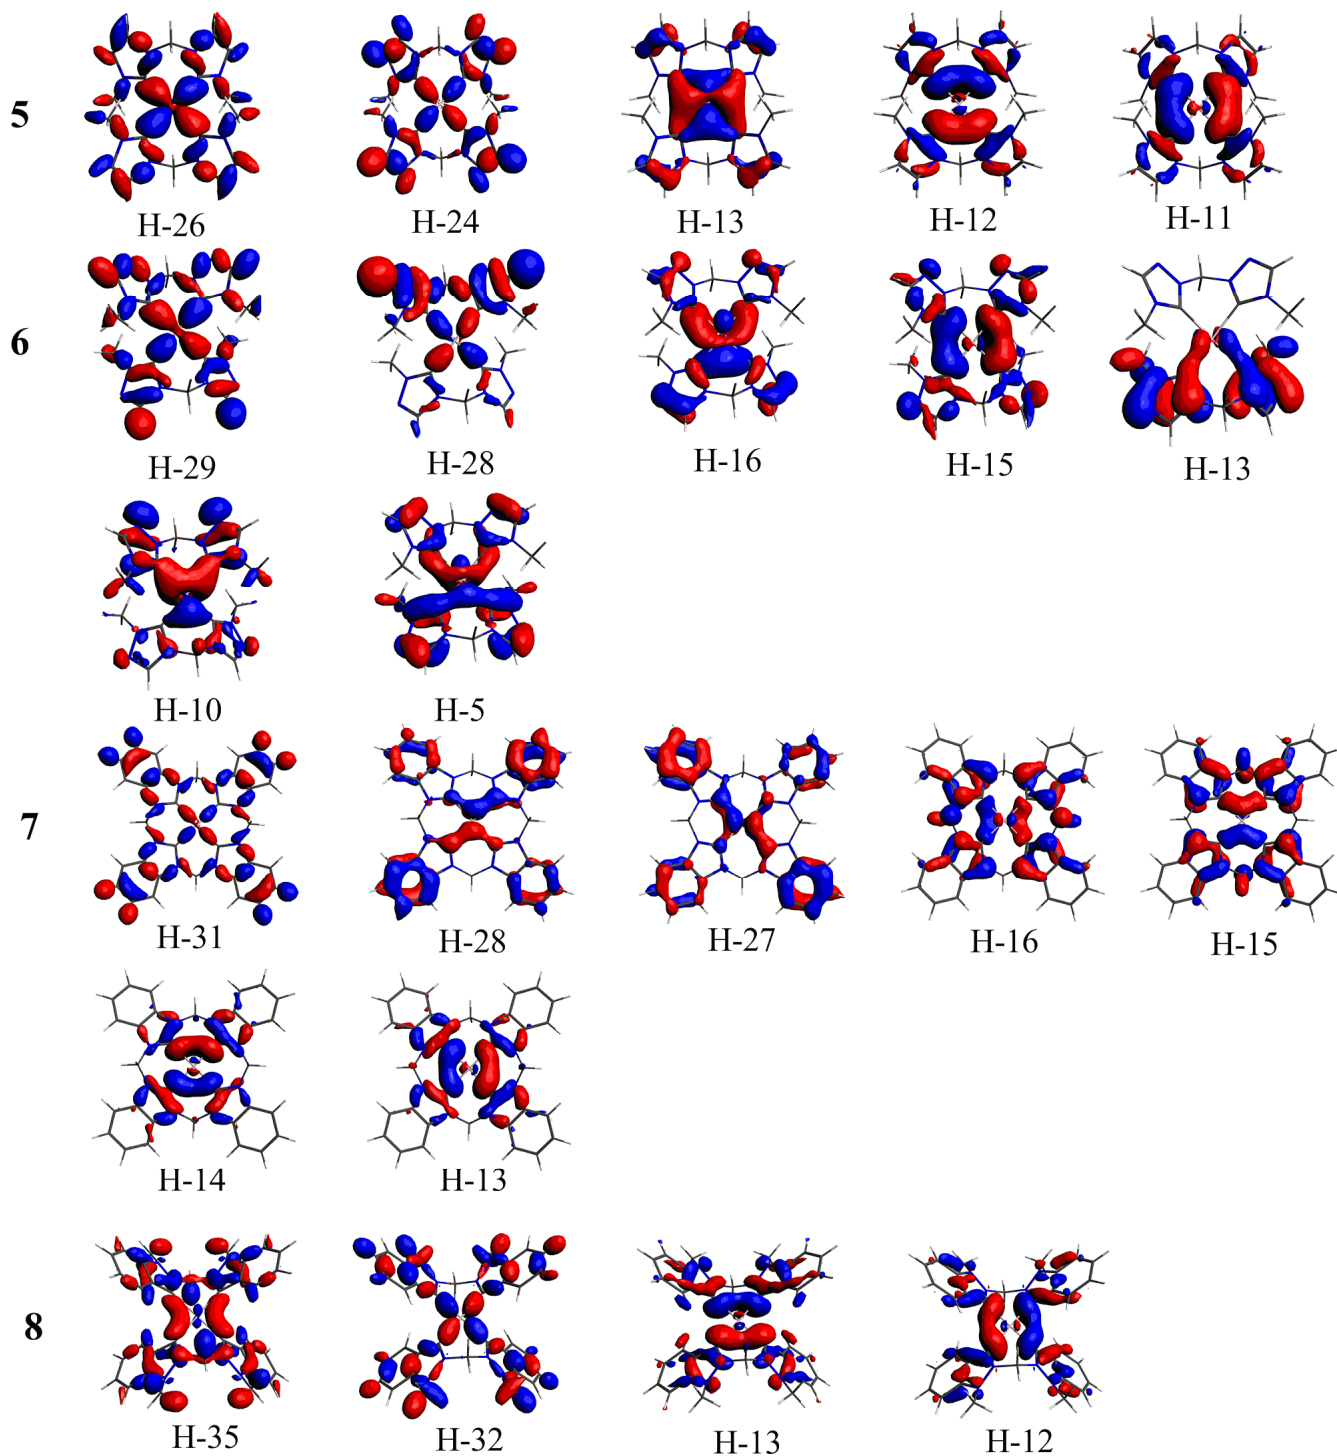

**Table S5.** Transition energies calculated at the optimized  $S_0$  geometry of **1** in the gas phase.

| State           | E/nm(eV)  | $f$    | Config. (CI coeff.) | Assignment |
|-----------------|-----------|--------|---------------------|------------|
| S <sub>1</sub>  | 331(3.74) | 0.0015 | H→L+1(0.997)        | MLCT/XLCT  |
| S <sub>4</sub>  | 309(4.01) | 0.0269 | H-1→L+1(0.967)      | MLCT/XLCT  |
| S <sub>9</sub>  | 282(4.40) | 0.0033 | H-2→L+1(0.994)      | MLCT       |
| S <sub>12</sub> | 272(4.56) | 0.0118 | H-4→L(0.968)        | XMCT       |
| S <sub>15</sub> | 262(4.73) | 0.0122 | H-5→L(0.948)        | LMCT       |
| S <sub>16</sub> | 261(4.75) | 0.2422 | H-3→L+1(0.904)      | MLCT/XLCT  |
| S <sub>33</sub> | 233(5.33) | 0.0157 | H-7→L+1(0.908)      | XLCT       |
| S <sub>47</sub> | 213(5.81) | 0.0166 | H-2→L+6(0.967)      | MLCT       |
| S <sub>50</sub> | 207(5.98) | 0.0210 | H-3→L+7(0.914)      | MLCT/XLCT  |

**Table S6.** Transition energies calculated at the optimized  $S_0$  geometry of **2** in the gas phase.

| State           | E/nm(eV)  | $f$    | Config. (CI coeff.) | Assignment     |
|-----------------|-----------|--------|---------------------|----------------|
| S <sub>1</sub>  | 360(3.44) | 0.0130 | H→L(0.784)          | XLCT/MLCT      |
|                 |           |        | H-2→L(0.195)        | XLCT/MLCT      |
| S <sub>2</sub>  | 356(3.48) | 0.0106 | H-2→L(0.802)        | XLCT/MLCT      |
|                 |           |        | H→L(0.186)          | XLCT/MLCT      |
| S <sub>4</sub>  | 329(3.77) | 0.0381 | H-3→L(0.815)        | XLCT/XMCT      |
| S <sub>9</sub>  | 308(4.03) | 0.0135 | H→L+2(0.875)        | XLCT/MLCT/MC   |
| S <sub>14</sub> | 300(4.14) | 0.0232 | H-1→L+2(0.834)      | XLCT/MC        |
| S <sub>15</sub> | 293(4.24) | 0.0227 | H-3→L+2(0.813)      | XLCT/XMCT      |
| S <sub>17</sub> | 291(4.26) | 0.0109 | H-4→L(0.950)        | MLCT           |
| S <sub>21</sub> | 269(4.62) | 0.0109 | H-2→L+4(0.946)      | XLCT/MLCT/MC   |
| S <sub>26</sub> | 259(4.78) | 0.0249 | H-3→L+4(0.572)      | XLCT/XMCT      |
|                 |           |        | H-4→L+2(0.268)      | MLCT/MXCT/MC   |
| S <sub>28</sub> | 258(4.80) | 0.0326 | H-4→L+2(0.494)      | MLCT/MXCT/MC   |
|                 |           |        | H-5→L(0.298)        | XLCT/MLCT/ILCT |
| S <sub>29</sub> | 254(4.87) | 0.0186 | H-6→L(0.788)        | XLCT/ILCT      |
| S <sub>32</sub> | 239(5.18) | 0.0125 | H-5→L+1(0.678)      | XLCT/MLCT/ILCT |
|                 |           |        | H-6→L+3(0.290)      | XLCT/MLCT/ILCT |
| S <sub>41</sub> | 230(5.38) | 0.0121 | H-2→L+7(0.911)      | XLCT/MLCT      |
| S <sub>42</sub> | 229(5.43) | 0.0528 | H-5→L+2(0.383)      | XLCT/MC        |
|                 |           |        | H-4→L+5(0.364)      | MLCT           |
| S <sub>44</sub> | 226(5.48) | 0.0385 | H-4→L+5(0.602)      | MLCT           |
|                 |           |        | H-5→L+2(0.184)      | XLCT/MC        |
| S <sub>46</sub> | 225(5.50) | 0.0099 | H-6→L+2(0.712)      | XLCT/MC        |
| S <sub>48</sub> | 223(5.57) | 0.0158 | H-8→L+1(0.413)      | XLCT/MLCT      |
|                 |           |        | H-5→L+3(0.295)      | XLCT/MLCT/ILCT |

**Table S7.** Transition energies calculated at the optimized  $S_0$  geometry of **3** in the gas phase.

| State           | E/nm(eV)  | $f$    | Config. (CI coeff.) | Assignment                                                                    |
|-----------------|-----------|--------|---------------------|-------------------------------------------------------------------------------|
| S <sub>1</sub>  | 501(2.48) | 0.0008 | H→L(0.593)          | ML <sub>py</sub> CT/XL <sub>py</sub> CT                                       |
|                 |           |        | H-1→L(0.406)        | ML <sub>py</sub> CT/XL <sub>py</sub> CT                                       |
| S <sub>2</sub>  | 459(2.70) | 0.0563 | H-1→L(0.582)        | ML <sub>py</sub> CT/XL <sub>py</sub> CT                                       |
|                 |           |        | H→L(0.394)          | ML <sub>py</sub> CT/XL <sub>py</sub> CT                                       |
| S <sub>17</sub> | 283(4.39) | 0.0142 | H-10→L(0.710)       | ML <sub>py</sub> CT/L <sub>NHC</sub> L <sub>py</sub> CT/XL <sub>py</sub> CT   |
|                 |           |        | H-5→L(0.247)        | ML <sub>py</sub> CT/L <sub>NHC</sub> L <sub>py</sub> CT                       |
| S <sub>19</sub> | 276(4.49) | 0.0316 | H-5→L(0.585)        | ML <sub>py</sub> CT/L <sub>NHC</sub> L <sub>py</sub> CT                       |
|                 |           |        | H-10→L(0.235)       | ML <sub>py</sub> CT/L <sub>NHC</sub> L <sub>py</sub> CT/XL <sub>py</sub> CT   |
| S <sub>21</sub> | 266(4.66) | 0.0525 | H-2→L+3(0.660)      | ML <sub>NHC</sub> CT                                                          |
|                 |           |        | H→L+4(0.259)        | ML <sub>NHC</sub> CT/XL <sub>NHC</sub> CT                                     |
| S <sub>23</sub> | 260(4.77) | 0.0101 | H-3→L+2(0.544)      | MC/MXCT/MLCT                                                                  |
|                 |           |        | H→L+4(0.156)        | ML <sub>NHC</sub> CT/XL <sub>NHC</sub> CT                                     |
| S <sub>24</sub> | 259(4.79) | 0.0221 | H→L+4(0.362)        | ML <sub>NHC</sub> CT/XL <sub>NHC</sub> CT                                     |
|                 |           |        | H-3→L+2(0.194)      | MC/MXCT/MLCT                                                                  |
|                 |           |        | H-1→L+4(0.163)      | ML <sub>NHC</sub> CT/XL <sub>NHC</sub> CT                                     |
| S <sub>26</sub> | 256(4.84) | 0.0598 | H-5→L+1(0.401)      | ML <sub>py</sub> CT/L <sub>NHC</sub> L <sub>py</sub> CT                       |
|                 |           |        | H-9→L(0.316)        | IL <sub>py</sub> CT/L <sub>py</sub> MCT                                       |
| S <sub>31</sub> | 250(4.95) | 0.0128 | H-4→L+3(0.921)      | XL <sub>NHC</sub> CT/IL <sub>NHC</sub> CT/ML <sub>NHC</sub> CT                |
| S <sub>36</sub> | 246(5.05) | 0.0141 | H-2→L(0.594)        | ML <sub>py</sub> CT/L <sub>NHC</sub> L <sub>py</sub> CT                       |
|                 |           |        | H-4→L+2(0.210)      | L <sub>NHC</sub> MCT/L <sub>NHC</sub> XCT/L <sub>NHC</sub> L <sub>py</sub> CT |
| S <sub>39</sub> | 235(5.28) | 0.0594 | H-5→L+1(0.420)      | ML <sub>py</sub> CT/L <sub>NHC</sub> L <sub>py</sub> CT                       |
|                 |           |        | H-9→L(0.339)        | IL <sub>py</sub> CT/LMCT                                                      |
| S <sub>49</sub> | 219(5.67) | 0.2115 | H-3→L+4(0.700)      | ML <sub>NHC</sub> CT                                                          |
| S <sub>50</sub> | 215(5.78) | 0.0911 | H-12→L+1(0.748)     | ML <sub>py</sub> CT/XL <sub>py</sub> CT/L <sub>NHC</sub> L <sub>py</sub> CT   |



**Table S8.** Transition energies calculated at the optimized  $S_0$  geometry of **4** in the gas phase.

| State           | E/nm(eV)  | $f$    | Config. (CI coeff.) | Assignment                                                                    |
|-----------------|-----------|--------|---------------------|-------------------------------------------------------------------------------|
| S <sub>2</sub>  | 438(2.83) | 0.0073 | H-2→L(0.993)        | ML <sub>py</sub> CT/L <sub>NHC</sub> L <sub>py</sub> CT                       |
| S <sub>3</sub>  | 436(2.84) | 0.0654 | H-1→L(0.950)        | MLCT/XLCT                                                                     |
| S <sub>7</sub>  | 347(3.57) | 0.0164 | H-4→L(0.647)        | L <sub>NHC</sub> MCT/L <sub>NHC</sub> L <sub>py</sub> CT                      |
| S <sub>8</sub>  | 332(3.74) | 0.0455 | H-2→L+1(0.299)      | ML <sub>py</sub> CT/L <sub>NHC</sub> L <sub>py</sub> CT                       |
|                 |           |        | H-4→L(0.331)        | L <sub>NHC</sub> MCT/L <sub>NHC</sub> L <sub>py</sub> CT                      |
| S <sub>11</sub> | 311(3.98) | 0.0499 | H-5→L(0.807)        | L <sub>NHC</sub> MCT/L <sub>NHC</sub> L <sub>py</sub> CT                      |
| S <sub>14</sub> | 285(4.36) | 0.0203 | H-4→L+1(0.585)      | L <sub>NHC</sub> L <sub>py</sub> CT                                           |
|                 |           |        | H→L+3(0.255)        | XMCT/XL <sub>py</sub> CT                                                      |
| S <sub>21</sub> | 267(4.65) | 0.1883 | H-2→L+2(0.657)      | ML <sub>py</sub> CT                                                           |
|                 |           |        | H-6→L+1(0.222)      | MLCT/XLCT                                                                     |
| S <sub>26</sub> | 255(4.87) | 0.0370 | H-5→L+1(0.600)      | L <sub>NHC</sub> L <sub>py</sub> CT                                           |
|                 |           |        | H-10→L(0.305)       | L <sub>NHC</sub> L <sub>py</sub> CT                                           |
| S <sub>28</sub> | 247(5.02) | 0.1968 | H-6→L+1(0.609)      | MLCT/XLCT                                                                     |
| S <sub>30</sub> | 238(5.20) | 0.1130 | H-3→L+3(0.520)      | MC/MXCT/MLCT                                                                  |
|                 |           |        | H-10→L(0.278)       | L <sub>NHC</sub> L <sub>py</sub> CT                                           |
| S <sub>31</sub> | 238(5.21) | 0.0899 | H-2→L+4(0.733)      | ML <sub>NHC</sub> CT/L <sub>py</sub> L <sub>NHC</sub> CT/IL <sub>NHC</sub> CT |
| S <sub>33</sub> | 237(5.23) | 0.0998 | H-10→L(0.328)       | L <sub>NHC</sub> L <sub>py</sub> CT                                           |
|                 |           |        | H-3→L+3(0.324)      | MC/MXCT/MLCT                                                                  |
| S <sub>39</sub> | 227(5.45) | 0.0204 | H-4→L+2(0.345)      | L <sub>NHC</sub> L <sub>py</sub> CT                                           |
|                 |           |        | H-9→L+1(0.326)      | MLCT/XLCT                                                                     |
| S <sub>41</sub> | 226(5.47) | 0.0167 | H-9→L+1(0.498)      | MLCT/XLCT                                                                     |
|                 |           |        | H-2→L+5(0.224)      | ML <sub>NHC</sub> CT/L <sub>py</sub> L <sub>NHC</sub> CT                      |
|                 |           |        | H-4→L+4(0.155)      | IL <sub>NHC</sub> CT                                                          |
| S <sub>45</sub> | 220(5.64) | 0.1197 | H-10→L+1(0.687)     | L <sub>NHC</sub> L <sub>py</sub> CT                                           |
|                 |           |        | H-13→L(0.178)       | L <sub>NHC</sub> MCT/L <sub>NHC</sub> L <sub>py</sub> CT                      |
| S <sub>49</sub> | 205(6.03) | 0.0330 | H-5→L+4(0.881)      | L <sub>py</sub> L <sub>NHC</sub> CT                                           |

**Table S9.** Transition energies calculated at the optimized  $S_0$  geometry of **5** in the gas phase, and together with the available experimental values.

| State           | E/nm(eV)  | $f$    | Config. (CI coeff.) | Assignment | Expt.(nm) |
|-----------------|-----------|--------|---------------------|------------|-----------|
| S <sub>1</sub>  | 334(3.71) | 0.0834 | H-1→L(0.976)        | MLCT/ILCT  |           |
| S <sub>2</sub>  | 332(3.73) | 0.1725 | H→L(0.972)          | MLCT/ILCT  | 315       |
| S <sub>5</sub>  | 287(4.31) | 0.0130 | H-3→L(0.989)        | LMCT       | 280       |
| S <sub>8</sub>  | 250(4.96) | 0.0550 | H→L+2(0.796)        | MLCT/ILCT  |           |
|                 |           |        | H-2→L+1(0.183)      | MLCT       |           |
| S <sub>9</sub>  | 246(5.03) | 0.1004 | H-1→L+2(0.878)      | MLCT/ILCT  |           |
| S <sub>10</sub> | 244(5.09) | 0.0122 | H-5→L(0.985)        | MLCT       |           |
| S <sub>11</sub> | 240(5.16) | 0.0417 | H-6→L(0.776)        | MLCT/ILCT  |           |
|                 |           |        | H-2→L+1(0.153)      | MLCT       |           |
| S <sub>17</sub> | 235(5.27) | 0.0225 | H-2→L+1(0.506)      | MLCT       |           |
|                 |           |        | H-6→L(0.178)        | MLCT/ILCT  |           |
| S <sub>20</sub> | 230(5.39) | 0.0101 | H→L+6(0.437)        | MLCT/ILCT  |           |
|                 |           |        | H-2→L+3(0.361)      | MLCT       |           |
| S <sub>24</sub> | 228(5.43) | 0.0355 | H-8→L(0.885)        | LMCT/ILCT  |           |
| S <sub>29</sub> | 226(5.50) | 0.0160 | H-1→L+6(0.266)      | MLCT/ILCT  |           |
|                 |           |        | H-9→L(0.262)        | LMCT/ILCT  |           |
|                 |           |        | H-2→L+7(0.161)      | MLCT       |           |
| S <sub>33</sub> | 218(5.70) | 0.0928 | H-2→L+5(0.326)      | MLCT       |           |
|                 |           |        | H-4→L+3(0.284)      | ILCT       | 220       |
|                 |           |        | H-2→L+7(0.234)      | MLCT       |           |
| S <sub>36</sub> | 216(5.73) | 0.0425 | H-2→L+3(0.342)      | MLCT       |           |
|                 |           |        | H-4→L+7(0.319)      | ILCT       |           |
| S <sub>40</sub> | 214(5.79) | 0.1406 | H-2→L+5(0.240)      | MLCT       |           |
|                 |           |        | H-4→L+3(0.199)      | ILCT       |           |
|                 |           |        | H-2→L+7(0.184)      | MLCT       |           |
| S <sub>45</sub> | 206(6.03) | 0.0215 | H-4→L+5(0.612)      | LMCT/ILCT  |           |
|                 |           |        | H-1→L+9(0.181)      | MLCT/ILCT  |           |

**Table S10.** Transition energies calculated at the optimized  $S_0$  geometry of **6** in the gas phase, and together with the available experimental values.

| State           | E/nm(eV)  | $f$    | Config. (CI coeff.) | Assignment | Expt.(nm) |
|-----------------|-----------|--------|---------------------|------------|-----------|
| S <sub>1</sub>  | 300(4.14) | 0.1444 | H→L(0.962)          | MLCT/ILCT  |           |
| S <sub>2</sub>  | 299(4.14) | 0.0734 | H-1→L(0.969)        | MLCT/ILCT  |           |
| S <sub>3</sub>  | 289(4.29) | 0.0127 | H-2→L(0.988)        | MLCT       |           |
| S <sub>4</sub>  | 275(4.50) | 0.0047 | H-3→L(0.965)        | LMCT       |           |
| S <sub>5</sub>  | 267(4.65) | 0.0032 | H-4→L(0.934)        | MLCT/ILCT  |           |
| S <sub>13</sub> | 233(5.32) | 0.0254 | H-9→L(0.398)        | MLCT/ILCT  |           |
|                 |           |        | H-1→L+1(0.315)      | MLCT       |           |
| S <sub>16</sub> | 231(5.38) | 0.0295 | H→L+2(0.580)        | MLCT/ILCT  |           |
| S <sub>19</sub> | 228(5.44) | 0.0205 | H-12→L(0.771)       | MLCT/LLCT  |           |
| S <sub>21</sub> | 227(5.46) | 0.0645 | H-1→L+2(0.677)      | MLCT/ILCT  |           |
| S <sub>28</sub> | 219(5.66) | 0.0178 | H-14→L(0.705)       | LMCT/LLCT  | 216       |

**Table S11.** Transition energies calculated at the optimized  $S_0$  geometry of **7** in the gas phase.

| State           | E/nm(eV)  | $f$    | Config. (CI coeff.) | Assignment |
|-----------------|-----------|--------|---------------------|------------|
| S <sub>1</sub>  | 405(3.06) | 0.2546 | H→L(0.857)          | MLCT/ILCT  |
| S <sub>2</sub>  | 405(3.06) | 0.2546 | H-1→L(0.857)        | MLCT/ILCT  |
| S <sub>5</sub>  | 378(3.28) | 0.0117 | H-4→L(0.728)        | LMCT/LLCT  |
|                 |           |        | H-5→L(0.247)        | LMCT/ILCT  |
| S <sub>6</sub>  | 378(3.28) | 0.0117 | H-5→L(0.728)        | LMCT/ILCT  |
|                 |           |        | H-4→L(0.247)        | LMCT/LLCT  |
| S <sub>9</sub>  | 311(3.98) | 0.2123 | H→L+1(0.901)        | MLCT/LLCT  |
| S <sub>10</sub> | 311(3.98) | 0.2123 | H-1→L+1(0.901)      | MLCT/LLCT  |
| S <sub>11</sub> | 311(3.98) | 0.0140 | H-8→L(0.993)        | MLCT       |
| S <sub>24</sub> | 274(4.53) | 0.0499 | H-2→L+2(0.772)      | LMCT/ILCT  |
|                 |           |        | H-7→L+3(0.168)      | ILCT       |
| S <sub>25</sub> | 274(4.53) | 0.0499 | H-2→L+3(0.771)      | LMCT/ILCT  |
|                 |           |        | H-7→L+2(0.168)      | LLCT       |
| S <sub>32</sub> | 260(4.76) | 0.0804 | H-7→L+2(0.331)      | LLCT       |
|                 |           |        | H→L+4(0.272)        | MLCT/LLCT  |
| S <sub>33</sub> | 260(4.76) | 0.0802 | H-7→L+3(0.330)      | ILCT       |
|                 |           |        | H-1→L+4(0.272)      | MLCT/LLCT  |
| S <sub>35</sub> | 259(4.80) | 0.0750 | H-9→L(0.583)        | MLCT/ILCT  |
|                 |           |        | H-1→L+4(0.227)      | MLCT/LLCT  |
| S <sub>36</sub> | 258(4.80) | 0.0751 | H-10→L(0.583)       | MLCT/ILCT  |
|                 |           |        | H→L+4(0.228)        | MLCT/LLCT  |
| S <sub>37</sub> | 253(4.90) | 0.0272 | H-1→L+5(0.397)      | MLCT/LLCT  |
|                 |           |        | H→L+5(0.141)        | MLCT/LLCT  |
| S <sub>38</sub> | 253(4.90) | 0.0273 | H→L+5(0.393)        | MLCT/LLCT  |
|                 |           |        | H-1→L+5(0.139)      | MLCT/LLCT  |

**Table S12.** Transition energies calculated at the optimized  $S_0$  geometry of **8** in the gas phase.

| State           | E/nm(eV)  | $f$    | Config. (CI coeff.) | Assignment |
|-----------------|-----------|--------|---------------------|------------|
| S <sub>1</sub>  | 477(2.60) | 0.0296 | H-1→L(0.955)        | MLCT/ILCT  |
| S <sub>2</sub>  | 474(2.61) | 0.1048 | H→L(0.949)          | MLCT/ILCT  |
| S <sub>8</sub>  | 384(3.23) | 0.0180 | H-4→L(0.984)        | MLCT       |
| S <sub>9</sub>  | 377(3.29) | 0.0249 | H-1→L+2(0.760)      | MLCT/ILCT  |
| S <sub>11</sub> | 369(3.36) | 0.0884 | H-5→L(0.829)        | MLCT/ILCT  |
| S <sub>12</sub> | 365(3.39) | 0.0786 | H→L+2(0.386)        | MLCT/ILCT  |
|                 |           |        | H-2→L+1(0.289)      | LMCT/ILCT  |
|                 |           |        | H-3→L+3(0.203)      | ILCT       |
| S <sub>16</sub> | 353(3.51) | 0.0436 | H-8→L(0.934)        | ILCT       |
| S <sub>21</sub> | 325(3.82) | 0.1866 | H-2→L+3(0.408)      | ILCT       |
|                 |           |        | H-3→L+1(0.270)      | LMCT/ILCT  |
|                 |           |        | H-1→L+2(0.176)      | MLCT/ILCT  |
| S <sub>22</sub> | 322(3.85) | 0.0201 | H-3→L+3(0.629)      | ILCT       |
| S <sub>26</sub> | 314(3.95) | 0.0439 | H-11→L(0.753)       | MLCT       |
|                 |           |        | H-12→L(0.174)       | ILCT       |
| S <sub>29</sub> | 307(4.04) | 0.0630 | H-12→L(0.806)       | ILCT       |
| S <sub>31</sub> | 306(4.06) | 0.0580 | H-6→L+1(0.720)      | LMCT/ILCT  |
|                 |           |        | H-8→L+2(0.181)      | ILCT       |
| S <sub>36</sub> | 293(4.23) | 0.0268 | H-8→L+2(0.545)      | ILCT       |
|                 |           |        | H-7→L+3(0.399)      | MLCT       |
| S <sub>39</sub> | 282(4.40) | 0.0406 | H-9→L+2(0.826)      | MLCT       |
| S <sub>41</sub> | 273(4.53) | 0.1380 | H-11→L+2(0.269)     | MLCT       |
|                 |           |        | H-7→L+3(0.263)      | MLCT       |
| S <sub>43</sub> | 273(4.55) | 0.0115 | H-10→L+1(0.860)     | MLCT       |
| S <sub>47</sub> | 268(4.63) | 0.0925 | H-1→L+4(0.523)      | MLCT/ILCT  |

**Table S13.** Excitation energies  $E(T_m)$ , zero-filed-splitting (ZFS) parameters and radiative decay rate constants  $k_r$  of the  $T_m \rightarrow S_0$  transitions of **1-8** at their respective  $T_1$  optimized geometries obtained by DFT/TDDFT calculations. <sup>a,b</sup>

| Complexes |       | $E(T_m)$ | $\Delta E_{1-2}$ | $\Delta E_{1-3}$ | $k_r^1$         | $k_r^2$ | $k_r^3$ | $k_r$   |
|-----------|-------|----------|------------------|------------------|-----------------|---------|---------|---------|
|           |       | nm       | $\text{cm}^{-1}$ |                  | $\text{s}^{-1}$ |         |         |         |
| <b>1</b>  | $T_1$ | 1328     | 14.2             | 320.5            | 0.17            | 2020.61 | 2076.84 | 1365.88 |
|           | $T_2$ | 737      | 1358.1           | 1439.4           | 1.35E+5         | 41.77   | 1457.73 | 4.56E+4 |
| <b>2</b>  | $T_1$ | 4001     | 37.5             | 371.3            | 41.53           | 44.86   | 775.19  | 287.20  |
|           | $T_2$ | 855      | 5023.1           | 5045.1           | 4.13E+4         | 9132.42 | 2939.45 | 1.78E+4 |
| <b>3</b>  | $T_1$ | 2309     | 24.0             | 315.6            | 18.64           | 23.13   | 257.93  | 99.90   |
|           | $T_2$ | 859      | 1382.1           | 1548.4           | 4.39E+4         | 4655.49 | 2.09E+4 | 2.32E+4 |
|           | $T_3$ | 811      | 260.0            | 1557.0           | 2.02E+4         | 1.54E+5 | 4597.70 | 5.97E+4 |
| <b>4</b>  | $T_1$ | 814      | 2.1              | 169.7            | 60.75           | 8190.01 | 9.81E+4 | 3.55E+4 |
| <b>5</b>  | $T_1$ | 409      | 15.5             | 209.9            | 243.07          | 1.71E+4 | 8.55E+5 | 2.91E+5 |
|           | $T_2$ | 406      | 245.0            | 304.5            | 1.63E+6         | 3.03E+2 | 2.06E+5 | 6.13E+5 |
| <b>6</b>  | $T_1$ | 867      | 11.7             | 83.2             | 6.99E+3         | 4.30E+3 | 6.46E+3 | 5.92E+3 |
|           | $T_2$ | 438      | 6014.6           | 6071.4           | 1.14E+5         | 2.73E+4 | 1.99E+5 | 1.13E+5 |
|           | $T_3$ | 406      | 824.1            | 2618.7           | 7.42E+5         | 2.09E+6 | 9.79E+3 | 9.49E+5 |
| <b>7</b>  | $T_1$ | 478      | 1.4              | 133.2            | 0.06            | 255.89  | 5.76E+5 | 1.92E+5 |
|           | $T_2$ | 477      | 150.7            | 216.8            | 6.14E+5         | 0.00    | 8.09E+4 | 2.32E+5 |
| <b>8</b>  | $T_1$ | 559      | 4.2              | 97.4             | 8.50            | 3995.21 | 1.49E+5 | 5.12E+4 |
|           | $T_2$ | 556      | 105.3            | 112.6            | 3.32E+5         | 0.22    | 1.53E+4 | 1.16E+5 |
|           | $T_3$ | 541      | 0.8              | 830.8            | 5.22            | 358.68  | 8.40E+6 | 2.80E+6 |

<sup>a</sup>  $k_r^i \equiv \frac{1}{\tau_i} = \frac{2}{t_0} \alpha_0^3 (\Delta E^i)^2 f^i$  where  $t_0 = (4\pi\epsilon_0)^2 \hbar^3 / m_e e$ ,  $\alpha_0$  is the fine structure constant. Excitation energies  $\Delta E^i$  and oscillator strengths  $f^i$  can be calculated with inclusion of SOC effects.

<sup>b</sup>  $k_r^i = \frac{1}{3} (k_r^1 + k_r^2 + k_r^3)$

**Table S14.** Molecular orbital compositions at the optimized geometry for **6**.

| Orbits | Energy (eV) | $d_{\text{Pt}}$ (%) | $\pi$ (%)              |                    |
|--------|-------------|---------------------|------------------------|--------------------|
|        |             |                     | $\text{P}_{\text{Pt}}$ | $\pi_{\text{NHC}}$ |
| HOMO-1 | -12.58      | 43.70               |                        | 36.29              |
| HOMO   | -11.32      | 22.81               | 46.86                  | 12.34              |
| LUMO   | -9.85       | 16.54               | 21.01                  | 42.86              |

**Table S15.** Cartesian coordinates of **1** at the  $S_0$  optimized geometry.

|    |           |           |           |
|----|-----------|-----------|-----------|
| Pt | 0.000000  | 0.000000  | 0.001851  |
| Cl | 1.820525  | -1.489054 | 0.002391  |
| Cl | -1.820525 | 1.489054  | 0.002391  |
| C  | 0.000000  | 0.000000  | 2.031201  |
| N  | 0.268139  | 1.043297  | 2.868573  |
| C  | 0.656257  | 2.375955  | 2.417947  |
| H  | 0.027865  | 2.651923  | 1.565056  |
| H  | 1.711784  | 2.385159  | 2.119889  |
| H  | 0.500341  | 3.084206  | 3.238344  |
| C  | 0.172487  | 0.658434  | 4.196284  |
| H  | 0.356322  | 1.342219  | 5.013791  |
| C  | -0.172487 | -0.658434 | 4.196284  |
| H  | -0.356322 | -1.342219 | 5.013791  |
| N  | -0.268139 | -1.043297 | 2.868573  |
| C  | -0.656257 | -2.375955 | 2.417947  |
| H  | -0.500341 | -3.084206 | 3.238344  |
| H  | -0.027865 | -2.651923 | 1.565056  |
| C  | 0.000000  | 0.000000  | -2.027680 |
| N  | -0.267173 | -1.043573 | -2.865188 |
| C  | -0.656978 | -2.375930 | -2.415476 |
| H  | -1.720634 | -2.392552 | -2.147761 |
| H  | -0.050346 | -2.638974 | -1.543125 |
| H  | -0.470829 | -3.089724 | -3.224781 |
| C  | -0.172061 | -0.658510 | -4.192921 |
| H  | -0.355636 | -1.342376 | -5.010447 |
| C  | 0.172061  | 0.658510  | -4.192921 |
| H  | 0.355636  | 1.342376  | -5.010447 |
| N  | 0.267173  | 1.043573  | -2.865188 |
| C  | 0.656978  | 2.375930  | -2.415476 |
| H  | 0.050346  | 2.638974  | -1.543125 |
| H  | 0.470829  | 3.089724  | -3.224781 |
| H  | 1.720634  | 2.392552  | -2.147761 |
| H  | -1.711784 | -2.385159 | 2.119889  |

**Table S16.** Cartesian coordinates of **1** at the  $T_1$  optimized geometry.

|    |           |           |           |
|----|-----------|-----------|-----------|
| Pt | -0.060704 | -0.106733 | 0.001849  |
| Cl | 2.421449  | 0.237078  | 0.020569  |
| Cl | -1.351791 | 2.039937  | -0.019351 |
| C  | -0.106004 | -0.233707 | 2.051780  |
| N  | 0.305916  | 0.684190  | 2.973735  |
| C  | 0.908370  | 1.978689  | 2.648270  |
| H  | 0.263648  | 2.499749  | 1.932452  |
| H  | 1.893618  | 1.819859  | 2.196570  |
| H  | 0.996217  | 2.558103  | 3.572414  |
| C  | 0.119817  | 0.219525  | 4.262688  |
| H  | 0.390925  | 0.802777  | 5.132428  |
| C  | -0.426132 | -1.023797 | 4.162222  |

|   |           |           |           |
|---|-----------|-----------|-----------|
| H | -0.726984 | -1.729980 | 4.924127  |
| N | -0.553771 | -1.284965 | 2.808228  |
| C | -1.128647 | -2.507087 | 2.266628  |
| H | -0.746530 | -3.372315 | 2.820578  |
| H | -0.828757 | -2.577538 | 1.215955  |
| C | -0.114563 | -0.228501 | -2.048308 |
| N | -0.629513 | -1.250057 | -2.803207 |
| C | -1.263182 | -2.440159 | -2.256539 |
| H | -2.286525 | -2.536017 | -2.639915 |
| H | -1.287619 | -2.318011 | -1.167619 |
| H | -0.685934 | -3.336718 | -2.515238 |
| C | -0.481005 | -1.001631 | -4.157414 |
| H | -0.828333 | -1.686379 | -4.919390 |
| C | 0.142744  | 0.204415  | -4.259394 |
| H | 0.445007  | 0.770689  | -5.130133 |
| N | 0.354318  | 0.660347  | -2.971286 |
| C | 1.007243  | 1.930497  | -2.647660 |
| H | 0.380777  | 2.478290  | -1.935506 |
| H | 1.118843  | 2.504078  | -3.572900 |
| H | 1.983954  | 1.735803  | -2.192067 |
| H | -2.224335 | -2.483949 | 2.330308  |

**Table S17.** Cartesian coordinates of **2** at the  $S_0$  optimized geometry.

|    |           |           |           |
|----|-----------|-----------|-----------|
| Pt | 0.082938  | 0.108674  | 0.063815  |
| Cl | -1.708388 | 0.035737  | -1.475672 |
| Cl | -1.480590 | -0.063629 | 1.827222  |
| N  | 1.629368  | -0.242518 | -2.586537 |
| C  | 1.406292  | 0.353220  | -1.379173 |
| N  | 2.439538  | 1.251658  | -1.257708 |
| N  | 2.603256  | 1.182295  | 1.113236  |
| C  | 1.593056  | 0.273930  | 1.323088  |
| N  | 1.977770  | -0.390023 | 2.451606  |
| C  | 2.582746  | 2.049191  | -0.052119 |
| H  | 1.730051  | 2.733844  | 0.026790  |
| H  | 3.518211  | 2.613120  | -0.100150 |
| C  | 0.856570  | -1.354495 | -3.137923 |
| H  | -0.129212 | -1.352174 | -2.660618 |
| H  | 1.379020  | -2.301034 | -2.949457 |
| H  | 0.738514  | -1.205697 | -4.216641 |
| C  | 2.769066  | 0.273423  | -3.191462 |
| H  | 3.105719  | -0.064932 | -4.162142 |
| C  | 3.287789  | 1.211389  | -2.355729 |
| H  | 4.151511  | 1.854168  | -2.457618 |
| C  | 1.283794  | -1.535195 | 3.038721  |
| H  | 0.242471  | -1.510857 | 2.700175  |
| H  | 1.313139  | -1.448078 | 4.130181  |
| H  | 1.773479  | -2.466927 | 2.728113  |
| C  | 3.594343  | 1.081684  | 2.079863  |
| H  | 4.466436  | 1.720977  | 2.099138  |
| C  | 3.191820  | 0.094629  | 2.923046  |



|   |          |           |          |
|---|----------|-----------|----------|
| H | 3.657442 | -0.298163 | 3.816853 |
|---|----------|-----------|----------|

**Table S18.** Cartesian coordinates of **2** at the T<sub>1</sub> optimized geometry.

|    |           |           |           |
|----|-----------|-----------|-----------|
| Pt | 0.096949  | -0.060433 | 0.156256  |
| Cl | -2.052212 | -0.029375 | -0.805814 |
| Cl | 0.642885  | -2.492053 | 0.151455  |
| N  | 1.531735  | -0.208260 | -2.636542 |
| C  | 1.362058  | 0.373489  | -1.422243 |
| N  | 2.461246  | 1.171983  | -1.268970 |
| N  | 2.643740  | 1.166087  | 1.126964  |
| C  | 1.589071  | 0.334099  | 1.431149  |
| N  | 1.956322  | -0.234004 | 2.617960  |
| C  | 2.640637  | 1.980905  | -0.072517 |
| H  | 1.813216  | 2.698988  | -0.012556 |
| H  | 3.590382  | 2.517355  | -0.143704 |
| C  | 0.607027  | -1.184604 | -3.212015 |
| H  | -0.359688 | -1.073360 | -2.710826 |
| H  | 0.983308  | -2.199606 | -3.042293 |
| H  | 0.500710  | -0.988485 | -4.284542 |
| C  | 2.718609  | 0.210451  | -3.226638 |
| H  | 3.036564  | -0.136509 | -4.201066 |
| C  | 3.311145  | 1.081831  | -2.365335 |
| H  | 4.232263  | 1.643360  | -2.446764 |
| C  | 1.153847  | -1.221354 | 3.331902  |
| H  | 0.102478  | -1.054415 | 3.076095  |
| H  | 1.306098  | -1.095102 | 4.409529  |
| H  | 1.426742  | -2.234051 | 3.015881  |
| C  | 3.637436  | 1.109829  | 2.097742  |
| H  | 4.542935  | 1.699485  | 2.049251  |
| C  | 3.197808  | 0.227792  | 3.034530  |
| H  | 3.658899  | -0.101445 | 3.956105  |

**Table S19.** Cartesian coordinates of **3** at the S<sub>0</sub> optimized geometry.

|    |           |          |           |
|----|-----------|----------|-----------|
| Pt | 2.017362  | 4.733120 | 7.697408  |
| Cl | -0.267518 | 4.675956 | 7.956606  |
| N  | 4.069355  | 4.784471 | 7.463502  |
| C  | 4.776822  | 3.632362 | 7.304331  |
| N  | 3.208065  | 2.161031 | 8.496043  |
| C  | 4.002945  | 2.334506 | 7.284059  |
| C  | 2.277507  | 3.084733 | 8.866381  |
| N  | 1.785882  | 2.623987 | 10.044779 |
| C  | 0.794233  | 3.294086 | 10.888272 |
| C  | 2.399529  | 1.428831 | 10.397107 |

|   |           |          |           |
|---|-----------|----------|-----------|
| C | 3.302492  | 1.134552 | 9.423144  |
| C | 6.160504  | 3.643755 | 7.149500  |
| C | 6.848015  | 4.853916 | 7.145870  |
| C | 4.736772  | 5.970918 | 7.465602  |
| N | 2.868999  | 7.356939 | 6.667424  |
| C | 3.924561  | 7.229163 | 7.667559  |
| C | 1.925964  | 6.386233 | 6.510177  |
| N | 1.158627  | 6.816690 | 5.476497  |
| C | 0.034121  | 6.096241 | 4.876310  |
| C | 1.616201  | 8.039876 | 5.003676  |
| C | 2.700154  | 8.383054 | 5.750559  |
| C | 6.118549  | 6.028636 | 7.304276  |
| H | 3.329774  | 2.323689 | 6.415618  |
| H | 4.693173  | 1.491128 | 7.198607  |
| H | 2.142332  | 0.894558 | 11.302059 |
| H | 3.974391  | 0.294872 | 9.308039  |
| H | 6.690940  | 2.700981 | 7.029312  |
| H | 7.928623  | 4.880944 | 7.022321  |
| H | 3.465288  | 7.211685 | 8.665675  |
| H | 4.573978  | 8.105906 | 7.599795  |
| H | 1.134973  | 8.556758 | 4.184052  |
| H | 3.338452  | 9.255508 | 5.716618  |
| H | 6.615196  | 6.997103 | 7.307161  |
| H | -0.106533 | 5.158192 | 5.415508  |
| H | -0.877404 | 6.696939 | 4.964424  |
| H | 0.249825  | 5.902589 | 3.819455  |
| H | 1.243854  | 3.532269 | 11.858972 |
| H | 0.467307  | 4.205215 | 10.384680 |
| H | -0.070116 | 2.637074 | 11.031899 |

**Table S20.** Cartesian coordinates of **3** at the  $T_1$  optimized geometry.

|    |          |          |           |
|----|----------|----------|-----------|
| Pt | 1.939417 | 4.871619 | 7.887412  |
| Cl | 0.975580 | 3.471827 | 6.103764  |
| N  | 4.100917 | 4.664205 | 7.340571  |
| C  | 4.663168 | 3.437295 | 7.285073  |
| N  | 3.073511 | 2.280290 | 8.821476  |
| C  | 3.789254 | 2.230575 | 7.545012  |
| C  | 2.185529 | 3.267188 | 9.124182  |
| N  | 1.684103 | 2.922183 | 10.338472 |
| C  | 0.684274 | 3.692601 | 11.073892 |
| C  | 2.247293 | 1.735437 | 10.785212 |
| C  | 3.126556 | 1.328667 | 9.828366  |
| C  | 6.008447 | 3.284794 | 6.945085  |
| C  | 6.773046 | 4.408412 | 6.646125  |
| C  | 4.835623 | 5.767091 | 7.085427  |
| N  | 2.953331 | 7.354435 | 6.587522  |
| C  | 4.202338 | 7.125952 | 7.305009  |
| C  | 1.842690 | 6.583386 | 6.776988  |
| N  | 0.890646 | 7.157374 | 5.996189  |

|   |           |          |           |
|---|-----------|----------|-----------|
| C | -0.496017 | 6.702070 | 5.891538  |
| C | 1.394427  | 8.271106 | 5.341238  |
| C | 2.698072  | 8.398429 | 5.709770  |
| C | 6.177698  | 5.664932 | 6.720360  |
| H | 3.038364  | 2.163431 | 6.741493  |
| H | 4.402298  | 1.326058 | 7.537146  |
| H | 1.980328  | 1.285314 | 11.732097 |
| H | 3.763755  | 0.455982 | 9.779712  |
| H | 6.444483  | 2.287920 | 6.910947  |
| H | 7.820129  | 4.307758 | 6.367242  |
| H | 4.008432  | 7.242438 | 8.382121  |
| H | 4.909218  | 7.904448 | 7.005899  |
| H | 0.791534  | 8.871126 | 4.672743  |
| H | 3.445534  | 9.128297 | 5.429956  |
| H | 6.748253  | 6.566670 | 6.504895  |
| H | -0.539776 | 5.651612 | 6.190227  |
| H | -1.140912 | 7.311584 | 6.535545  |
| H | -0.825218 | 6.790100 | 4.851560  |
| H | 1.075723  | 3.971123 | 12.058700 |
| H | 0.464300  | 4.596754 | 10.498486 |
| H | -0.231422 | 3.102840 | 11.193573 |

**Table S21.** Cartesian coordinates of **4** at the  $S_0$  optimized geometry.

|    |           |           |           |
|----|-----------|-----------|-----------|
| Pt | 9.876229  | 0.033372  | 19.214321 |
| N  | 8.188781  | -1.436671 | 21.521495 |
| N  | 8.387305  | 0.718702  | 21.549034 |
| N  | 9.557918  | 1.835952  | 19.963306 |
| N  | 10.802577 | 2.535264  | 18.204105 |
| N  | 11.626761 | 1.149024  | 16.760207 |
| C  | 8.750259  | -0.425183 | 20.832530 |
| C  | 7.493843  | -0.962613 | 22.634483 |
| C  | 7.614932  | 0.388241  | 22.656682 |
| C  | 8.820402  | 1.964421  | 21.087845 |
| C  | 8.574811  | 3.214484  | 21.644424 |
| C  | 9.117385  | 4.329960  | 20.999698 |
| C  | 9.880585  | 4.196657  | 19.836038 |
| C  | 10.082447 | 2.913668  | 19.340027 |
| C  | 11.497191 | 3.307922  | 17.280430 |
| C  | 12.010998 | 2.434722  | 16.378492 |
| C  | 10.881333 | 1.177660  | 17.881140 |
| C  | 11.994863 | -0.065176 | 16.025892 |
| C  | 8.285618  | -2.854605 | 21.162290 |
| H  | 6.974872  | -1.627942 | 23.312101 |
| H  | 7.225104  | 1.117955  | 23.351003 |
| H  | 7.982475  | 3.321334  | 22.548140 |
| H  | 8.942291  | 5.321233  | 21.411614 |
| H  | 10.300666 | 5.065149  | 19.337667 |
| H  | 11.568396 | 4.384197  | 17.336714 |
| H  | 12.616024 | 2.614613  | 15.499447 |

|    |           |           |           |
|----|-----------|-----------|-----------|
| H  | 8.885805  | -2.937710 | 20.251749 |
| H  | 7.280832  | -3.254122 | 20.986851 |
| H  | 8.765693  | -3.404097 | 21.979313 |
| H  | 11.561535 | -0.924805 | 16.544996 |
| H  | 13.086192 | -0.155477 | 15.997334 |
| H  | 11.600917 | -0.005625 | 15.005498 |
| Cl | 10.246024 | -2.060002 | 18.344590 |

**Table S22.** Cartesian coordinates of **4** at the T<sub>1</sub> optimized geometry.

|    |           |           |              |
|----|-----------|-----------|--------------|
| Pt | 9.779626  | 0.017973  | 19.135887    |
| N  | 8.518759  | -1.427402 | 21.679864    |
| N  | 8.401944  | 0.754678  | 21.561353    |
| N  | 9.358426  | 1.876169  | 19.841005    |
| N  | 10.807252 | 2.560222  | 18.239410    |
| N  | 11.894916 | 1.106584  | 17.017313    |
| C  | 8.926890  | -0.369510 | 20.919343    |
| C  | 7.740519  | -0.985127 | 22.732624    |
| C  | 7.665810  | 0.376521  | 22.672028    |
| C  | 8.740915  | 2.004688  | 21.055308    |
| C  | 8.579770  | 3.238779  | 21.659454    |
| C  | 9.129104  | 4.365528  | 21.027955    |
| C  | 9.886221  | 4.219501  | 19.855161    |
| C  | 10.007535 | 2.955487  | 19.306004    |
| C  | 11.542530 | 3.286495  | 17.317278    |
| C  | 12.211337 | 2.370608  | 16.557433    |
| C  | 11.005069 | 1.190438  | 18.049507    |
| C  | 12.452059 | -0.140004 | 16.495709    |
| C  | 8.879854  | -2.821970 | 21.432210    |
| H  | 7.286770  | -1.670309 | 23.437218    |
| H  | 7.137110  | 1.077067  | 23.301803    |
| H  | 8.068543  | 3.327668  | 22.614197    |
| H  | 9.022248  | 5.346192  | 21.483593    |
| H  | 10.390960 | 5.070979  | 19.406838    |
| H  | 11.516639 | 4.364444  | 17.252274    |
| H  | 12.875964 | 2.524936  | 15.717053    |
| H  | 8.858006  | -3.012125 | 20.354424    |
| H  | 8.158270  | -3.468576 | 21.938337    |
| H  | 9.888688  | -3.021923 | 21.811965    |
| H  | 11.660785 | -0.895015 | 16.448076    |
| H  | 13.251403 | -0.498650 | 17.154639    |
| H  | 12.851111 | 0.043812  | 15.494821    |
| Cl | 9.891926  | -2.016420 | 18.110211: q |

**Table S23.** Cartesian coordinates of **5** at the S<sub>0</sub> optimized geometry.

|    |           |           |           |
|----|-----------|-----------|-----------|
| Pt | -0.031372 | 0.070633  | 0.106224  |
| C  | 1.721211  | 0.732779  | -3.690608 |
| H  | 2.612843  | 1.039180  | -4.221788 |
| C  | 0.396804  | 0.302753  | -1.886908 |
| N  | 2.367566  | -1.881171 | 0.721129  |
| N  | -0.279028 | 0.047004  | -3.037288 |
| N  | 2.892633  | -0.195807 | -0.511133 |
| N  | 1.628759  | 0.725099  | -2.305736 |
| C  | 0.513592  | 0.310886  | -4.148667 |
| H  | 0.156255  | 0.167875  | -5.160411 |
| C  | 3.711388  | -2.019245 | 0.392320  |
| H  | 4.306740  | -2.856430 | 0.733523  |
| C  | 4.044738  | -0.960504 | -0.391326 |
| H  | 4.984697  | -0.689641 | -0.854065 |
| C  | 1.846555  | -0.753154 | 0.171887  |
| C  | 2.707248  | 0.975331  | -1.358209 |
| H  | 3.630547  | 1.174399  | -1.906303 |
| H  | 2.458232  | 1.842703  | -0.737668 |
| C  | 1.630775  | -2.890383 | 1.483469  |
| H  | 0.601780  | -2.549417 | 1.610506  |
| H  | 2.100380  | -3.036821 | 2.462093  |
| H  | 1.633214  | -3.838930 | 0.935010  |
| C  | -1.624565 | -0.519779 | -3.140680 |
| H  | -2.037494 | -0.624798 | -2.135851 |
| H  | -1.572157 | -1.505721 | -3.615805 |
| H  | -2.262436 | 0.137884  | -3.740888 |
| C  | -1.784591 | -0.591125 | 3.902891  |
| H  | -2.676345 | -0.897390 | 4.433912  |
| C  | -0.459821 | -0.161510 | 2.099370  |
| N  | -2.430348 | 2.022283  | -0.509087 |
| N  | 0.215743  | 0.094620  | 3.249825  |
| N  | -2.955465 | 0.337055  | 0.723304  |
| N  | -1.691887 | -0.583645 | 2.518055  |
| C  | -0.577067 | -0.169140 | 4.361089  |
| H  | -0.219910 | -0.025990 | 5.372867  |
| C  | -3.774344 | 2.160064  | -0.180847 |
| H  | -4.369794 | 2.997029  | -0.522414 |
| C  | -4.107694 | 1.101468  | 0.602980  |
| H  | -5.047717 | 0.830575  | 1.065571  |
| C  | -1.909296 | 0.894458  | 0.040503  |
| C  | -2.770216 | -0.834048 | 1.570457  |
| H  | -3.693579 | -1.033070 | 2.118456  |
| H  | -2.521108 | -1.701466 | 0.950049  |
| C  | -1.693335 | 3.031932  | -1.270596 |
| H  | -0.664559 | 2.690634  | -1.398434 |
| H  | -2.163272 | 3.179724  | -2.248851 |
| H  | -1.695099 | 3.979848  | -0.721034 |
| C  | 1.561259  | 0.661439  | 3.353405  |
| H  | 1.974915  | 0.765051  | 2.348723  |
| H  | 1.508667  | 1.648011  | 3.827208  |
| H  | 2.198625  | 0.004480  | 3.954908  |

**Table S24.** Cartesian coordinates of **5** at the T<sub>1</sub> optimized geometry.

|    |           |           |           |
|----|-----------|-----------|-----------|
| Pt | -0.031467 | 0.070588  | 0.106209  |
| C  | 1.715770  | 0.711271  | -3.687376 |
| H  | 2.609759  | 0.964131  | -4.242936 |
| C  | 0.395951  | 0.353976  | -1.856429 |
| N  | 2.361953  | -1.840899 | 0.781170  |
| N  | -0.311532 | 0.107764  | -3.018280 |
| N  | 2.905197  | -0.187137 | -0.523575 |
| N  | 1.646833  | 0.731722  | -2.309930 |
| C  | 0.477062  | 0.328251  | -4.127523 |
| H  | 0.114073  | 0.184523  | -5.137425 |
| C  | 3.683339  | -2.009675 | 0.429889  |
| H  | 4.275080  | -2.848070 | 0.775296  |
| C  | 4.028710  | -0.976218 | -0.400790 |
| H  | 4.967619  | -0.757295 | -0.893075 |
| C  | 1.840360  | -0.700017 | 0.197101  |
| C  | 2.721440  | 0.979493  | -1.366780 |
| H  | 3.645752  | 1.202155  | -1.903379 |
| H  | 2.434297  | 1.829130  | -0.727243 |
| C  | 1.599429  | -2.811962 | 1.561575  |
| H  | 0.605598  | -2.921217 | 1.114930  |
| H  | 1.494310  | -2.486565 | 2.603536  |
| H  | 2.122290  | -3.772276 | 1.539716  |
| C  | -1.667445 | -0.431896 | -3.082231 |
| H  | -1.794429 | -1.161834 | -2.276075 |
| H  | -1.808082 | -0.921860 | -4.049896 |
| H  | -2.415120 | 0.362949  | -2.973000 |
| C  | -1.778568 | -0.569246 | 3.899941  |
| H  | -2.672560 | -0.821895 | 4.455595  |
| C  | -0.458769 | -0.212439 | 2.068881  |
| N  | -2.425039 | 1.981916  | -0.569111 |
| N  | 0.248763  | 0.033983  | 3.230675  |
| N  | -2.968136 | 0.328355  | 0.735915  |
| N  | -1.709676 | -0.589998 | 2.522503  |
| C  | -0.539813 | -0.186222 | 4.339978  |
| H  | -0.176788 | -0.042294 | 5.349841  |
| C  | -3.746514 | 2.150547  | -0.217991 |
| H  | -4.338353 | 2.988763  | -0.563641 |
| C  | -4.091786 | 1.117236  | 0.612880  |
| H  | -5.030723 | 0.898239  | 1.105121  |
| C  | -1.903340 | 0.841224  | 0.015199  |
| C  | -2.784289 | -0.838049 | 1.579423  |
| H  | -3.708586 | -1.060611 | 2.116096  |
| H  | -2.497117 | -1.687845 | 0.940105  |
| C  | -1.662667 | 2.953009  | -1.349652 |
| H  | -0.668500 | 3.061677  | -0.903638 |
| H  | -1.558412 | 2.628020  | -2.391830 |
| H  | -2.185114 | 3.913535  | -1.327024 |
| C  | 1.604761  | 0.573451  | 3.294537  |
| H  | 1.732269  | 1.302157  | 2.487361  |
| H  | 1.745009  | 1.064827  | 4.261550  |

H 2.352339 -0.221713 3.186861

**Table S25.** Cartesian coordinates of **6** at the  $S_0$  optimized geometry.

|    |           |           |           |
|----|-----------|-----------|-----------|
| Pt | -0.053643 | -0.003983 | -0.031401 |
| N  | -2.802148 | 0.333177  | -1.165299 |
| N  | -1.628758 | 1.864602  | -2.052124 |
| N  | -3.663552 | 0.966878  | -2.019251 |
| C  | -1.549975 | 0.843319  | -1.149839 |
| N  | 1.499713  | -1.855440 | 1.989759  |
| N  | -2.231064 | -1.925032 | -0.755260 |
| N  | -0.414431 | -2.939474 | -1.178215 |
| C  | -2.919110 | 1.905178  | -2.542431 |
| N  | 2.708753  | -0.343003 | 1.109715  |
| C  | -3.209067 | -0.882637 | -0.473406 |
| H  | -4.178079 | -1.199161 | -0.865647 |
| H  | -3.272819 | -0.702957 | 0.605128  |
| N  | 2.744395  | -2.006339 | 2.554172  |
| N  | 0.297109  | 2.905450  | 1.122626  |
| C  | 1.432363  | -0.854378 | 1.093449  |
| N  | 2.136146  | 1.926125  | 0.695268  |
| N  | 1.279936  | 3.790760  | 1.497986  |
| C  | -0.890913 | -1.762806 | -0.676533 |
| C  | 0.989228  | -3.314224 | -1.384229 |
| H  | 1.578969  | -2.407877 | -1.536573 |
| H  | 1.058815  | -3.940330 | -2.278639 |
| H  | 1.370150  | -3.873229 | -0.522575 |
| C  | 3.463669  | -1.066073 | 2.007785  |
| C  | 0.774134  | 1.753522  | 0.617126  |
| C  | 0.428454  | -2.712695 | 2.492103  |
| H  | -0.484844 | -2.496366 | 1.934539  |
| H  | 0.274965  | -2.500939 | 3.555723  |
| H  | 0.721223  | -3.760699 | 2.374958  |
| C  | -1.086732 | 3.284481  | 1.399670  |
| H  | -1.746213 | 2.494691  | 1.035174  |
| H  | -1.304726 | 4.236734  | 0.906340  |
| H  | -1.212367 | 3.405489  | 2.480891  |
| C  | 2.394620  | 3.167141  | 1.236083  |
| C  | -0.544127 | 2.752349  | -2.486964 |
| H  | 0.408842  | 2.235248  | -2.357478 |
| H  | -0.551846 | 3.682144  | -1.907777 |
| H  | -0.681825 | 2.987072  | -3.546753 |
| C  | 3.078505  | 0.860132  | 0.371341  |
| H  | 3.052590  | 0.657076  | -0.704524 |
| H  | 4.087400  | 1.167413  | 0.658464  |
| N  | -2.628560 | -3.126576 | -1.275746 |
| C  | -1.494632 | -3.729804 | -1.518138 |
| H  | 3.385671  | 3.573714  | 1.405147  |
| H  | -1.407426 | -4.723595 | -1.944723 |
| H  | -3.263547 | 2.621254  | -3.280245 |

|   |          |           |          |
|---|----------|-----------|----------|
| H | 4.512620 | -0.888790 | 2.217137 |
|---|----------|-----------|----------|

**Table S26.** Cartesian coordinates of **6** at the T<sub>1</sub> optimized geometry.

|    |           |           |           |
|----|-----------|-----------|-----------|
| Pt | 0.138699  | -0.082430 | -0.240991 |
| N  | -2.587436 | 0.677405  | -1.278932 |
| N  | -1.175266 | 1.599068  | -2.572868 |
| N  | -3.351990 | 1.357182  | -2.185483 |
| C  | -1.253816 | 0.787403  | -1.477151 |
| N  | 2.091525  | -1.845126 | 1.660807  |
| N  | -2.592129 | -1.467426 | -0.284437 |
| N  | -1.118930 | -2.972306 | -0.638116 |
| C  | -2.459019 | 1.919596  | -2.960897 |
| N  | 2.877993  | 0.016328  | 0.998439  |
| C  | -3.204852 | -0.158820 | -0.250824 |
| H  | -4.268714 | -0.258685 | -0.477159 |
| H  | -3.057054 | 0.293051  | 0.734539  |
| N  | 3.298785  | -1.701063 | 2.308978  |
| N  | -0.337152 | 2.443632  | 1.735343  |
| C  | 1.795791  | -0.826544 | 0.824495  |
| N  | 1.675993  | 2.056772  | 1.132999  |
| N  | 0.398494  | 3.515216  | 2.184293  |
| C  | -1.254167 | -1.681484 | -0.189385 |
| C  | 0.119300  | -3.707670 | -0.922129 |
| H  | 0.968120  | -3.030546 | -0.805097 |
| H  | 0.090638  | -4.062180 | -1.958065 |
| H  | 0.216576  | -4.564447 | -0.248506 |
| C  | 3.749013  | -0.549443 | 1.905101  |
| C  | 0.401868  | 1.533267  | 1.075045  |
| C  | 1.285381  | -2.994612 | 2.058650  |
| H  | 0.255321  | -2.833584 | 1.735106  |
| H  | 1.322634  | -3.066839 | 3.149854  |
| H  | 1.701284  | -3.911704 | 1.629322  |
| C  | -1.760077 | 2.409259  | 2.061296  |
| H  | -2.028076 | 1.401226  | 2.391623  |
| H  | -2.357257 | 2.716413  | 1.195305  |
| H  | -1.922172 | 3.116772  | 2.878208  |
| C  | 1.621389  | 3.253986  | 1.807003  |
| C  | 0.051005  | 2.036532  | -3.248057 |
| H  | 0.847322  | 1.325854  | -3.009321 |
| H  | 0.330015  | 3.042507  | -2.915627 |
| H  | -0.116285 | 2.042698  | -4.329481 |
| C  | 2.840817  | 1.389110  | 0.539688  |
| H  | 2.749132  | 1.406835  | -0.553621 |
| H  | 3.751033  | 1.911407  | 0.844984  |
| N  | -3.297256 | -2.536305 | -0.783514 |
| C  | -2.375149 | -3.440352 | -0.969819 |
| H  | 2.474349  | 3.896306  | 1.995852  |
| H  | -2.564030 | -4.439648 | -1.347248 |
| H  | -2.696551 | 2.549049  | -3.811542 |



H 4.687009 -0.105561 2.219908

**Table S27.** Cartesian coordinates of **7** at the  $S_0$  optimized geometry.

|    |           |           |           |
|----|-----------|-----------|-----------|
| Pt | -0.031513 | 0.127925  | 0.117245  |
| C  | -0.221089 | 1.497051  | -1.322371 |
| C  | -0.175480 | 3.470928  | -2.444016 |
| C  | -0.677223 | 2.485878  | -3.314968 |
| C  | -1.063850 | 2.793705  | -4.618755 |
| H  | -1.469498 | 2.047923  | -5.299062 |
| C  | -0.910437 | 4.118432  | -5.025260 |
| H  | -1.197569 | 4.399144  | -6.036069 |
| C  | -0.393288 | 5.098523  | -4.161052 |
| H  | -0.286241 | 6.119929  | -4.519179 |
| C  | -0.014359 | 4.793680  | -2.854468 |
| H  | 0.388087  | 5.563474  | -2.199451 |
| C  | -1.297217 | 0.047333  | -3.055554 |
| H  | -1.173366 | 0.010552  | -4.141644 |
| N  | 0.077611  | 2.818018  | -1.224798 |
| N  | -0.673440 | 1.284318  | -2.584788 |
| C  | -0.267786 | -1.323410 | -1.232099 |
| C  | -0.758488 | -2.421919 | -3.157939 |
| C  | -0.289048 | -3.365426 | -2.225170 |
| C  | -0.172690 | -4.716395 | -2.549918 |
| H  | 0.204348  | -5.455737 | -1.846485 |
| C  | -0.562787 | -5.091380 | -3.834795 |
| H  | -0.490353 | -6.136636 | -4.126681 |
| C  | -1.047590 | -4.151840 | -4.760603 |
| H  | -1.344764 | -4.486858 | -5.751773 |
| C  | -1.156365 | -2.799443 | -4.439835 |
| H  | -1.537540 | -2.085606 | -5.166957 |
| C  | 0.677194  | -3.214068 | 0.107652  |
| H  | 0.378211  | -4.263360 | 0.184117  |
| N  | -0.714120 | -1.176929 | -2.506050 |
| N  | -0.012964 | -2.644610 | -1.049998 |
| C  | 0.157760  | -1.241176 | 1.556921  |
| C  | 0.450775  | -3.222429 | 2.627041  |
| C  | 0.272434  | -2.222684 | 3.601374  |
| C  | 0.277579  | -2.522249 | 4.963114  |
| H  | 0.124151  | -1.764340 | 5.728369  |
| C  | 0.488461  | -3.854880 | 5.314236  |
| H  | 0.502758  | -4.129710 | 6.366491  |
| C  | 0.683600  | -4.850414 | 4.341739  |
| H  | 0.848593  | -5.877757 | 4.658464  |
| C  | 0.670137  | -4.553463 | 2.979635  |
| H  | 0.826894  | -5.335391 | 2.239633  |
| C  | -0.292917 | 0.241435  | 3.522264  |
| H  | 0.149523  | 0.265988  | 4.522227  |
| N  | 0.357954  | -2.572923 | 1.383505  |
| N  | 0.110004  | -1.017694 | 2.895330  |

|   |           |           |           |
|---|-----------|-----------|-----------|
| C | 0.204999  | 1.579253  | 1.466550  |
| C | 0.355331  | 2.685066  | 3.444159  |
| C | 0.565693  | 3.613950  | 2.408037  |
| C | 0.829919  | 4.956735  | 2.674931  |
| H | 1.011653  | 5.684082  | 1.886562  |
| C | 0.855160  | 5.339563  | 4.015266  |
| H | 1.054810  | 6.378971  | 4.265798  |
| C | 0.628189  | 4.415348  | 5.049269  |
| H | 0.653035  | 4.756296  | 6.081802  |
| C | 0.372442  | 3.070768  | 4.783948  |
| H | 0.194875  | 2.368918  | 5.596014  |
| C | 0.788080  | 3.437008  | -0.105478 |
| H | 0.524246  | 4.498399  | -0.096400 |
| N | 0.151655  | 1.443510  | 2.816484  |
| N | 0.449589  | 2.889696  | 1.208534  |
| H | -1.387781 | 0.262980  | 3.616528  |
| H | 1.762419  | -3.164147 | -0.059239 |
| H | -2.370522 | 0.072618  | -2.820071 |
| H | 1.870792  | 3.340452  | -0.268147 |

**Table S28.** Cartesian coordinates of **7** at the T<sub>1</sub> optimized geometry.

|    |           |           |           |
|----|-----------|-----------|-----------|
| Pt | 0.028319  | 0.126355  | 0.108374  |
| C  | -0.177142 | 1.484685  | -1.313458 |
| C  | -0.165933 | 3.470888  | -2.426338 |
| C  | -0.670795 | 2.474910  | -3.304224 |
| C  | -1.076237 | 2.787420  | -4.601608 |
| H  | -1.481976 | 2.040474  | -5.280217 |
| C  | -0.937473 | 4.114714  | -5.004744 |
| H  | -1.238360 | 4.399068  | -6.010508 |
| C  | -0.412384 | 5.098525  | -4.141304 |
| H  | -0.316080 | 6.120808  | -4.500047 |
| C  | -0.015418 | 4.793473  | -2.839263 |
| H  | 0.388553  | 5.564570  | -2.187148 |
| C  | -1.324097 | 0.049604  | -2.997010 |
| H  | -1.340339 | 0.014911  | -4.089059 |
| N  | 0.101813  | 2.826166  | -1.217412 |
| N  | -0.641475 | 1.275827  | -2.591924 |
| C  | -0.224145 | -1.312477 | -1.223816 |
| C  | -0.752946 | -2.410880 | -3.147693 |
| C  | -0.281271 | -3.365155 | -2.207243 |
| C  | -0.176127 | -4.715798 | -2.534546 |
| H  | 0.202003  | -5.456860 | -1.833925 |
| C  | -0.584383 | -5.089893 | -3.814912 |
| H  | -0.523225 | -6.135688 | -4.107391 |
| C  | -1.076486 | -4.146112 | -4.740228 |
| H  | -1.387613 | -4.483831 | -5.726169 |
| C  | -1.169848 | -2.791831 | -4.422963 |
| H  | -1.550596 | -2.076519 | -5.148496 |
| C  | 0.765030  | -3.179432 | 0.093202  |

|   |           |           |           |
|---|-----------|-----------|-----------|
| H | 0.581452  | -4.254896 | 0.152978  |
| N | -0.682483 | -1.170380 | -2.513578 |
| N | 0.009468  | -2.653768 | -1.041801 |
| C | 0.197517  | -1.231180 | 1.535736  |
| C | 0.454654  | -3.223224 | 2.607825  |
| C | 0.276326  | -2.212362 | 3.589623  |
| C | 0.262002  | -2.515680 | 4.950901  |
| H | 0.108485  | -1.756542 | 5.714584  |
| C | 0.457830  | -3.850226 | 5.303211  |
| H | 0.457790  | -4.127992 | 6.354785  |
| C | 0.660136  | -4.849896 | 4.329135  |
| H | 0.815108  | -5.877629 | 4.649710  |
| C | 0.664705  | -4.553649 | 2.965981  |
| H | 0.823387  | -5.337047 | 2.228311  |
| C | -0.335509 | 0.240330  | 3.474809  |
| H | -0.024885 | 0.268696  | 4.522070  |
| N | 0.378130  | -2.582656 | 1.369786  |
| N | 0.143384  | -1.011045 | 2.893046  |
| C | 0.244282  | 1.566021  | 1.446075  |
| C | 0.357660  | 2.673614  | 3.432993  |
| C | 0.568752  | 3.612991  | 2.388690  |
| C | 0.823374  | 4.955892  | 2.661112  |
| H | 1.007487  | 5.684671  | 1.874966  |
| C | 0.829740  | 5.338918  | 4.002450  |
| H | 1.019075  | 6.379354  | 4.256678  |
| C | 0.595007  | 4.411024  | 5.038320  |
| H | 0.605014  | 4.755477  | 6.069917  |
| C | 0.354566  | 3.063896  | 4.772002  |
| H | 0.176433  | 2.360816  | 5.582558  |
| C | 0.875490  | 3.397881  | -0.117418 |
| H | 0.727972  | 4.480492  | -0.126863 |
| N | 0.184275  | 1.435235  | 2.814668  |
| N | 0.469826  | 2.897339  | 1.194172  |
| H | -1.436686 | 0.257065  | 3.422797  |
| H | 1.839296  | -3.002197 | -0.076243 |
| H | -2.359698 | 0.079027  | -2.619871 |
| H | 1.943097  | 3.174407  | -0.273756 |

**Table S29.** Cartesian coordinates of non-truncated **7** at the  $S_0$  optimized geometry.

|    |          |           |           |
|----|----------|-----------|-----------|
| Pt | 7.852893 | 10.804151 | 1.706477  |
| C  | 6.070329 | 11.710816 | 1.746874  |
| C  | 4.262449 | 12.873911 | 2.472734  |
| C  | 4.162586 | 12.742773 | 1.078106  |
| C  | 3.101259 | 13.317799 | 0.374915  |
| H  | 3.010132 | 13.241816 | -0.705192 |
| C  | 2.146018 | 14.011346 | 1.114885  |
| H  | 1.308492 | 14.473922 | 0.597767  |
| C  | 2.243661 | 14.130767 | 2.511383  |
| H  | 1.479042 | 14.681855 | 3.054140  |

|   |           |           |           |
|---|-----------|-----------|-----------|
| C | 3.307807  | 13.570558 | 3.213961  |
| H | 3.389037  | 13.692830 | 4.290936  |
| C | 5.437321  | 11.482215 | -0.736381 |
| H | 5.059522  | 12.296722 | -1.365183 |
| C | 4.940393  | 9.115261  | -0.246960 |
| H | 6.011625  | 8.991541  | -0.047247 |
| H | 4.596666  | 8.239202  | -0.810808 |
| H | 4.401687  | 9.142410  | 0.717817  |
| C | 3.319833  | 10.478937 | -1.491754 |
| H | 2.610316  | 10.625497 | -0.659486 |
| H | 3.019443  | 9.580595  | -2.044845 |
| H | 3.241660  | 11.331757 | -2.178493 |
| N | 5.441422  | 12.209547 | 2.846101  |
| N | 5.297221  | 12.014339 | 0.669963  |
| N | 4.707545  | 10.311307 | -1.056177 |
| C | 7.911383  | 11.007588 | -0.282563 |
| C | 7.259032  | 11.262767 | -2.440649 |
| C | 8.622171  | 10.925185 | -2.436533 |
| C | 9.327213  | 10.761980 | -3.631457 |
| H | 10.378312 | 10.487331 | -3.653788 |
| C | 8.626066  | 10.960213 | -4.818955 |
| H | 9.144473  | 10.837676 | -5.767154 |
| C | 7.265017  | 11.308876 | -4.818547 |
| H | 6.751341  | 11.453289 | -5.766271 |
| C | 6.555726  | 11.458793 | -3.629321 |
| H | 5.496204  | 11.700972 | -3.640438 |
| C | 10.428727 | 10.632801 | -0.659675 |
| H | 10.857253 | 9.961325  | -1.412696 |
| C | 10.756125 | 12.919921 | 0.206737  |
| H | 9.953447  | 13.510918 | -0.270932 |
| H | 11.606488 | 13.585069 | 0.401664  |
| H | 10.390152 | 12.545503 | 1.170382  |
| C | 11.852166 | 12.227996 | -1.880285 |
| H | 12.263255 | 11.354141 | -2.402242 |
| H | 12.690512 | 12.892029 | -1.636566 |
| H | 11.173744 | 12.765219 | -2.564905 |
| N | 6.864785  | 11.320442 | -1.094520 |
| N | 8.986762  | 10.780437 | -1.083507 |
| N | 11.213841 | 11.811155 | -0.630340 |
| C | 9.643468  | 9.913393  | 1.668019  |
| C | 11.720464 | 9.282565  | 1.007522  |
| C | 11.539774 | 8.858982  | 2.334209  |
| C | 12.563266 | 8.209168  | 3.028325  |
| H | 12.452033 | 7.884932  | 4.059449  |
| C | 13.758308 | 7.989905  | 2.346503  |
| H | 14.576683 | 7.489524  | 2.859057  |
| C | 13.931095 | 8.405249  | 1.015463  |
| H | 14.879617 | 8.217862  | 0.517326  |
| C | 12.917716 | 9.065783  | 0.325124  |
| H | 13.071421 | 9.408153  | -0.694950 |
| C | 9.597645  | 8.799596  | 3.986843  |
| H | 10.410271 | 8.845370  | 4.721094  |
| C | 9.991804  | 6.393011  | 4.323931  |
| H | 10.613537 | 6.073334  | 3.470223  |
| H | 9.402866  | 5.531393  | 4.661460  |

|   |           |           |          |
|---|-----------|-----------|----------|
| H | 10.650384 | 6.688054  | 5.151119 |
| C | 8.058947  | 7.139614  | 3.004038 |
| H | 7.338167  | 7.958482  | 2.891513 |
| H | 7.514049  | 6.252962  | 3.351116 |
| H | 8.496237  | 6.914818  | 2.014090 |
| N | 10.523510 | 9.911332  | 0.629711 |
| N | 10.242082 | 9.264879  | 2.702743 |
| N | 9.071088  | 7.484920  | 4.002006 |
| C | 7.785860  | 10.583865 | 3.693439 |
| C | 8.167586  | 9.794282  | 5.786021 |
| C | 7.084992  | 10.686533 | 5.849800 |
| C | 6.417012  | 10.923372 | 7.053664 |
| H | 5.568337  | 11.598196 | 7.125022 |
| C | 6.877409  | 10.249556 | 8.182861 |
| H | 6.377399  | 10.408820 | 9.135484 |
| C | 7.968047  | 9.366263  | 8.117042 |
| H | 8.297094  | 8.857183  | 9.020090 |
| C | 8.627508  | 9.117396  | 6.915777 |
| H | 9.452144  | 8.410823  | 6.870002 |
| C | 5.946750  | 12.299695 | 4.234722 |
| H | 5.082962  | 12.110436 | 4.882456 |
| C | 7.655551  | 14.040031 | 3.860487 |
| H | 8.559279  | 13.646072 | 4.360300 |
| H | 7.697058  | 15.136039 | 3.883847 |
| H | 7.668251  | 13.722235 | 2.810926 |
| C | 6.248554  | 14.112152 | 5.873053 |
| H | 5.256801  | 13.837399 | 6.255129 |
| H | 6.300364  | 15.207456 | 5.845456 |
| H | 7.015347  | 13.747712 | 6.577894 |
| N | 8.580609  | 9.773391  | 4.444462 |
| N | 6.884436  | 11.155093 | 4.536503 |
| N | 6.418361  | 13.606678 | 4.509461 |

**Table S30.** Cartesian coordinates of **8** at the  $S_0$  optimized geometry.

|    |           |           |           |
|----|-----------|-----------|-----------|
| Pt | 0.006207  | -0.003012 | -0.000278 |
| N  | -0.773229 | 2.597110  | 1.203399  |
| C  | 0.815924  | 1.815916  | 2.515415  |
| N  | -0.446313 | 3.651681  | 2.069312  |
| C  | 0.004091  | 1.502439  | 1.387280  |
| C  | -0.802968 | -1.824465 | -2.514417 |
| N  | -0.775167 | 2.597242  | -1.202546 |
| C  | 0.813888  | 1.817404  | -2.515647 |
| C  | 0.493078  | 3.136620  | 2.935094  |
| N  | 0.788076  | -2.602710 | -1.202689 |
| C  | -1.573535 | 2.793278  | 0.001113  |
| H  | -2.018539 | 3.789028  | 0.001556  |
| H  | -2.370326 | 2.042266  | 0.001676  |
| C  | -0.479642 | -3.145444 | -2.932486 |
| C  | -0.804821 | -1.823442 | 2.513464  |
| C  | 0.009385  | -1.509060 | -1.387071 |

|   |           |           |           |
|---|-----------|-----------|-----------|
| N | 0.787373  | -2.602400 | 1.203500  |
| C | -0.482123 | -3.144348 | 2.932250  |
| C | 0.002666  | 1.503023  | -1.387225 |
| N | 0.460394  | -3.659477 | -2.066326 |
| C | 0.008706  | -1.508615 | 1.386793  |
| N | 0.458695  | -3.658769 | 2.067174  |
| C | 1.587097  | -2.797995 | 0.000675  |
| H | 2.383407  | -2.046452 | 0.000786  |
| H | 2.032677  | -3.793455 | 0.000860  |
| N | -0.448176 | 3.653098  | -2.067335 |
| C | 0.490744  | 3.138327  | -2.934143 |
| C | 1.806952  | 1.093325  | -3.207616 |
| C | 2.415599  | 1.684670  | -4.297781 |
| C | 2.054674  | 2.988702  | -4.715282 |
| C | 1.092727  | 3.734820  | -4.052059 |
| C | -1.797105 | -1.101270 | -3.205728 |
| C | -2.406548 | -1.693525 | -4.294968 |
| C | -2.045340 | -2.997557 | -4.712195 |
| C | -1.082359 | -3.742824 | -4.049487 |
| C | 1.809502  | 1.091407  | 3.206227  |
| C | 2.419038  | 1.682057  | 4.296226  |
| C | 2.058564  | 2.985914  | 4.714793  |
| C | 1.096125  | 3.732460  | 4.052874  |
| C | -1.799679 | -1.099926 | 3.203425  |
| C | -2.410439 | -1.691782 | 4.292142  |
| C | -2.049869 | -2.995747 | 4.710118  |
| C | -1.086177 | -3.741307 | 4.048770  |
| H | 2.079021  | 0.092136  | -2.881819 |
| H | 3.183069  | 1.148167  | -4.851501 |
| H | 2.551772  | 3.422036  | -5.581281 |
| H | 0.839004  | 4.739297  | -4.384204 |
| H | -2.069317 | -0.100029 | -2.880239 |
| H | -3.174862 | -1.157699 | -4.848175 |
| H | -2.543004 | -3.431567 | -5.577540 |
| H | -0.828346 | -4.747334 | -4.381328 |
| H | 2.081310  | 0.090420  | 2.879596  |
| H | 3.186937  | 1.145189  | 4.848998  |
| H | 2.556493  | 3.418704  | 5.580586  |
| H | 0.842770  | 4.736776  | 4.385805  |
| H | -2.071446 | -0.098753 | 2.877328  |
| H | -3.179300 | -1.155692 | 4.844331  |
| H | -2.548656 | -3.429498 | 5.574935  |
| H | -0.832679 | -4.745735 | 4.381243  |
| C | 1.436159  | -4.691346 | -2.397792 |
| H | 1.713406  | -5.269223 | -1.509378 |
| H | 0.952953  | -5.382674 | -3.093027 |
| H | 2.332659  | -4.270741 | -2.874922 |
| C | 1.433916  | -4.690810 | 2.399704  |
| H | 0.949834  | -5.382048 | 3.094401  |
| H | 1.711997  | -5.268619 | 1.511535  |
| H | 2.329957  | -4.270298 | 2.877783  |
| C | -1.418030 | 4.688669  | 2.395602  |
| H | -0.937806 | 5.372296  | 3.100399  |
| H | -1.681280 | 5.273604  | 1.507481  |
| H | -2.322601 | 4.271871  | 2.860678  |

|   |           |          |           |
|---|-----------|----------|-----------|
| C | -1.422858 | 4.686578 | -2.396613 |
| H | -1.695348 | 5.266540 | -1.508078 |
| H | -0.940926 | 5.375604 | -3.094977 |
| H | -2.322137 | 4.267182 | -2.869571 |

**Table S31.** Cartesian coordinates of **8** at the T<sub>1</sub> optimized geometry.

|    |           |           |           |
|----|-----------|-----------|-----------|
| Pt | 0.005800  | -0.003467 | 0.000207  |
| N  | -0.852250 | 2.588131  | 1.211197  |
| C  | 0.809120  | 1.834707  | 2.474302  |
| N  | -0.460948 | 3.663518  | 2.034720  |
| C  | -0.044001 | 1.493433  | 1.375810  |
| C  | -0.797025 | -1.841890 | -2.474101 |
| N  | -0.852145 | 2.587904  | -1.210945 |
| C  | 0.808615  | 1.834027  | -2.474745 |
| C  | 0.509652  | 3.168149  | 2.873570  |
| N  | 0.864362  | -2.594812 | -1.210816 |
| C  | -1.642582 | 2.763424  | 0.000052  |
| H  | -2.139269 | 3.734847  | -0.000086 |
| H  | -2.395972 | 1.966530  | 0.000082  |
| C  | -0.497038 | -3.175183 | -2.873427 |
| C  | -0.797803 | -1.841296 | 2.474577  |
| C  | 0.055856  | -1.500407 | -1.375506 |
| N  | 0.863456  | -2.594782 | 1.211185  |
| C  | -0.498087 | -3.174716 | 2.873978  |
| C  | -0.043997 | 1.492966  | -1.375718 |
| N  | 0.473561  | -3.670422 | -2.034370 |
| C  | 0.055054  | -1.499955 | 1.375829  |
| N  | 0.472769  | -3.669508 | 2.035441  |
| C  | 1.654437  | -2.770008 | 0.000513  |
| H  | 2.407646  | -1.972935 | 0.000791  |
| H  | 2.151323  | -3.741339 | 0.000715  |
| N  | -0.461280 | 3.662765  | -2.035129 |
| C  | 0.509104  | 3.167491  | -2.874098 |
| C  | 1.817719  | 1.130013  | -3.148966 |
| C  | 2.468105  | 1.747676  | -4.214618 |
| C  | 2.137768  | 3.059882  | -4.609585 |
| C  | 1.158085  | 3.794058  | -3.949319 |
| C  | -1.806779 | -1.138212 | -3.147868 |
| C  | -2.457093 | -1.755993 | -4.213282 |
| C  | -2.125939 | -3.067967 | -4.608605 |
| C  | -1.145725 | -3.801743 | -3.948779 |
| C  | 1.818750  | 1.130828  | 3.147960  |
| C  | 2.469549  | 1.748585  | 4.213129  |
| C  | 2.138929  | 3.060676  | 4.608370  |
| C  | 1.158786  | 3.794664  | 3.948685  |
| C  | -1.807322 | -1.137633 | 3.148454  |
| C  | -2.458086 | -1.755637 | 4.213716  |
| C  | -2.127570 | -3.067754 | 4.608725  |
| C  | -1.147335 | -3.801570 | 3.948882  |

|   |           |           |           |
|---|-----------|-----------|-----------|
| H | 2.078068  | 0.120285  | -2.840349 |
| H | 3.247762  | 1.213978  | -4.754086 |
| H | 2.665643  | 3.513751  | -5.445805 |
| H | 0.923827  | 4.811473  | -4.255756 |
| H | -2.067535 | -0.128685 | -2.838935 |
| H | -3.237288 | -1.222744 | -4.752415 |
| H | -2.653677 | -3.521923 | -5.444875 |
| H | -0.910839 | -4.818883 | -4.255635 |
| H | 2.079116  | 0.121169  | 2.839142  |
| H | 3.249738  | 1.215186  | 4.752065  |
| H | 2.666989  | 3.514579  | 5.444435  |
| H | 0.924288  | 4.811898  | 4.255496  |
| H | -2.067761 | -0.127926 | 2.839863  |
| H | -3.238192 | -1.222259 | 4.752801  |
| H | -2.655704 | -3.521844 | 5.444655  |
| H | -0.912828 | -4.818889 | 4.255431  |
| C | 1.400259  | -4.750352 | -2.336407 |
| H | 1.640400  | -5.325077 | -1.434638 |
| H | 0.902628  | -5.428471 | -3.034177 |
| H | 2.322922  | -4.372229 | -2.800413 |
| C | 1.395385  | -4.754133 | 2.332017  |
| H | 0.899828  | -5.427716 | 3.035597  |
| H | 1.624747  | -5.332170 | 1.429501  |
| H | 2.323917  | -4.380229 | 2.787645  |
| C | -1.386298 | 4.744817  | 2.335669  |
| H | -0.888369 | 5.422304  | 3.033824  |
| H | -1.624726 | 5.319739  | 1.433569  |
| H | -2.309942 | 4.368105  | 2.798850  |
| C | -1.384943 | 4.746191  | -2.333230 |
| H | -1.617212 | 5.323333  | -1.430897 |
| H | -0.888747 | 5.421002  | -3.035201 |
| H | -2.311898 | 4.371171  | -2.791152 |
